# Supplementary material for: Characterization of Extracellular Vesicles Labelled with a Lipophilic Dye Using Fluorescence Nanoparticle Tracking Analysis
Source: MDPI journal article supplement (doi:10.3390/membranes11100779), 2021-10-12
Supplement: s1 [file s1]

## Article

# Characterization of Extracellular Vesicles Labeled with a Lipophilic Dye Using Fluorescence Nanoparticle Tracking Analysis

Getnet Midekessa <sup>1,2</sup>, Kasun Godakumara <sup>1,2</sup>, Keerthie Dissanayake <sup>1,2,3</sup>, Mohammad Mehedi Hasan <sup>1,2</sup>, Qurat Ul Ain Reshi <sup>1,2</sup>, Toonika Rinken <sup>4</sup> and Alireza Fazeli <sup>1,2,5,\*</sup>

<sup>1</sup> Institute of Veterinary Medicine and Animal Sciences, Estonian University of Life Sciences, Kreutzwaldi 62, 51006 Tartu, Estonia; getnet.balcha@ut.ee (G.M.); kasun.godagedara@ut.ee (K.G.); keerthie.dissanayake@ut.ee (K.D.); mehedi.hasan@ut.ee (M.M.H.); qurat.reshi@ut.ee (Q.U.A.R.)

<sup>2</sup> Department of Pathophysiology, Institute of Biomedicine and Translational Medicine, University of Tartu, Ravila St. 14b, 50411 Tartu, Estonia

<sup>3</sup> Department of Anatomy, Faculty of Medicine, University of Peradeniya, Peradeniya 20400, Sri Lanka

<sup>4</sup> Institute of Chemistry, University of Tartu, Ravila St. 14a, 50411 Tartu, Estonia; toonika.rinken@ut.ee

<sup>5</sup> Academic Unit of Reproductive and Developmental Medicine, Department of Oncology and Metabolism, Medical School, University of Sheffield, Sheffield S10 2SF, UK

\* Correspondence: alireza.fazeli@ut.ee; Tel.: +372-737-4425

**Citation:** Midekessa, G.; Godakumara, K.; Dissanayake, K.; Hasan, M.M.; Reshi, Q.U.A.; Rinken, T.; Fazeli, A. Characterization of Extracellular Vesicles Labeled with a Lipophilic Dye Using Fluorescence Nanoparticle Tracking Analysis. *Membranes* **2021**, *11*, 779. <https://doi.org/10.3390/membranes11100779>

Academic Editor: Shiro Suetsugu

Received: 8 September 2021

Accepted: 6 October 2021

Published: 12 October 2021

**Publisher's Note:** MDPI stays neutral with regard to jurisdictional claims in published maps and institutional affiliations.

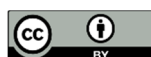

**Copyright:** © 2021 by the authors. Licensee MDPI, Basel, Switzerland. This article is an open access article distributed under the terms and conditions of the Creative Commons Attribution (CC BY) license (<http://creativecommons.org/licenses/by/4.0/>).

## 1. Supplementary information

Video S1: NTA data of JAr EVs only in 1× PBS solution (AVI).

Video S2: Data of JAr EVs with CMG (100 ng/mL) in 1× PBS solution measured at the fluorescent mode of NTA (AVI).

Video S3: Data of JAr EVs with CMG (100 ng/mL) in 1× PBS solution measured at scatter mode of NTA (AVI)

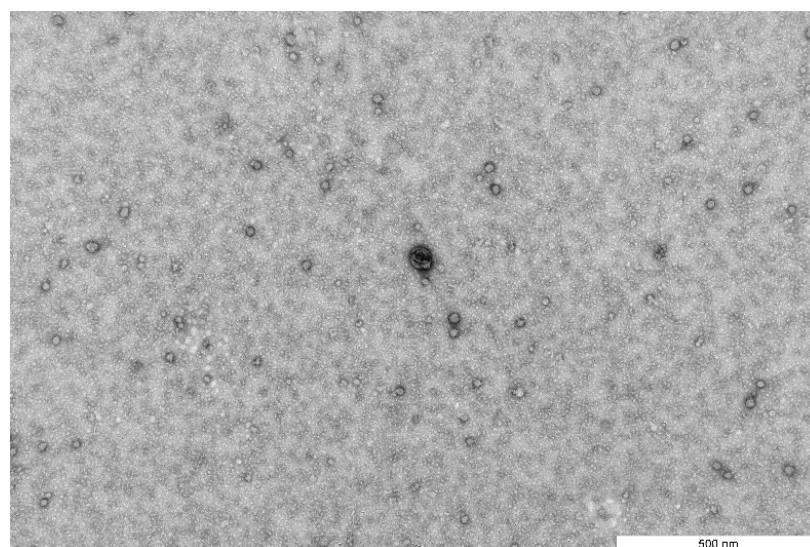

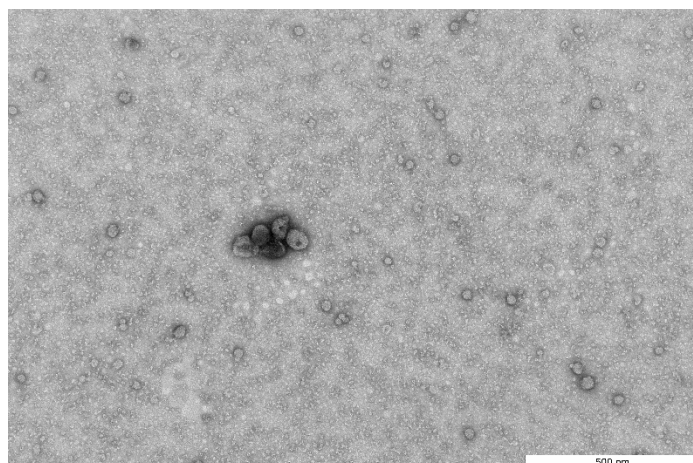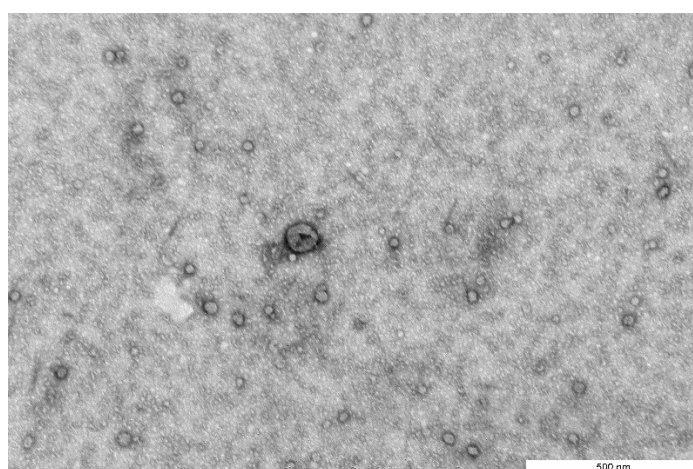

**Figure S1.** TEM images of the JAr EVs purified with SEC. Scale bars of 500 nm are displayed within the figures.

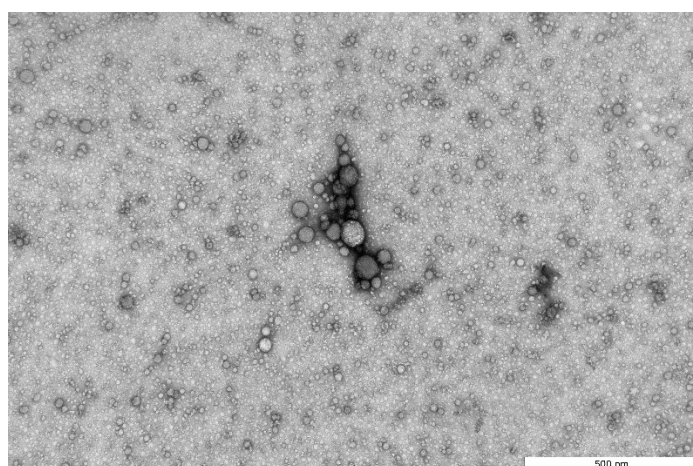

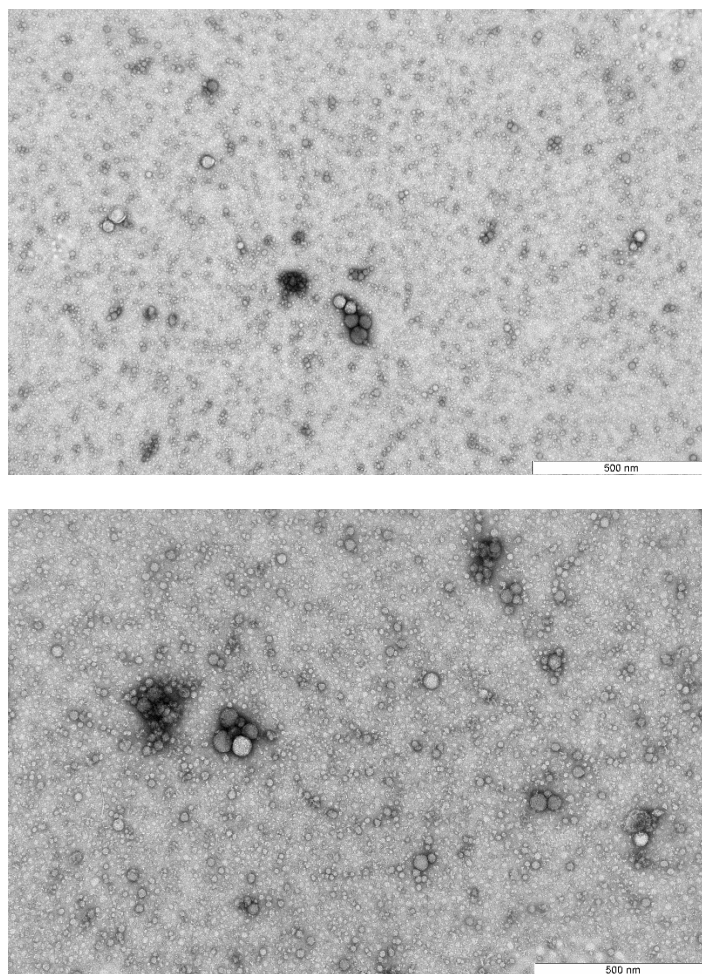

**Figure S2.** TEM images of the JAr EVs purified with TFF in combination of SEC. Scale bars of 500 nm are displayed within the figures.
